# Supplementary material for: Phosphoinositide 3-kinase enables phagocytosis of large particles by terminating actin assembly through Rac/Cdc42 GTPase-activating proteins
Source: PubMed Central journal article supplement (PMC4634337; doi:10.1038/ncomms9623), 2015-10-14
Supplement: ncomms9623-s1.pdf [file ncomms9623-s1.pdf]

## SUPPLEMENTARY INFORMATION

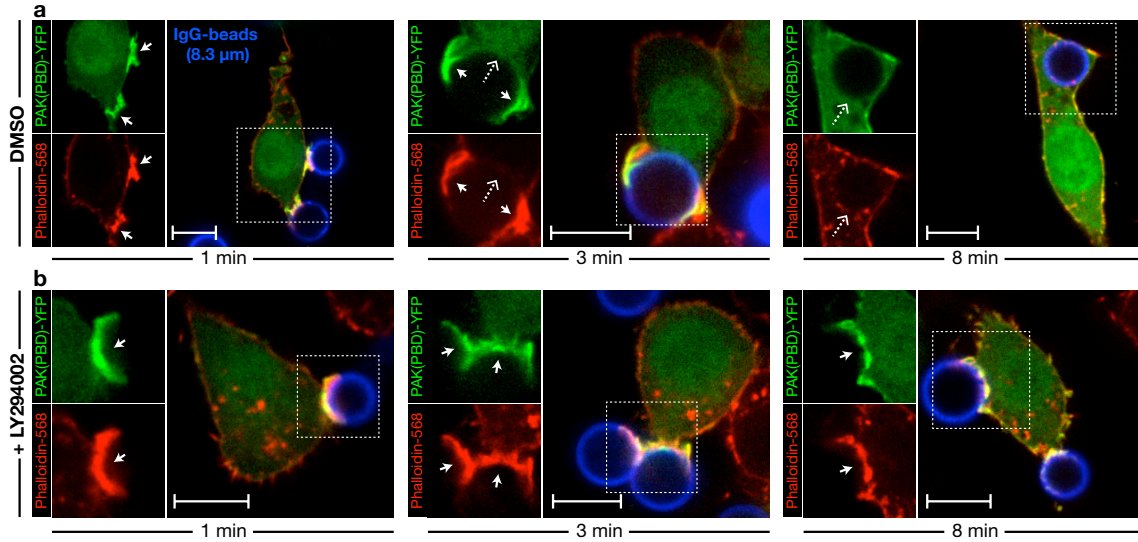

**Supplementary Figure 1:** Confocal micrographs of RAW 264.7 macrophages transfected with PAK(PBD)-YFP (shown in green), a biosensor for active Rac/Cdc42, during phagocytosis of 8.3- $\mu$ m IgG-beads. Prior to phagocytosis, cells were treated with DMSO (**a**) or LY294002 (**b**) for 10 min. Phagocytosis was allowed to proceed for the indicated times, before fixing and staining F-actin with phalloidin (shown in red). All phagocytic targets were stained with a Cy5-conjugated secondary antibody (shown in blue) prior to phagocytosis. Insets (boxed regions) show magnified views of the phagocytic cup. Scale bar, 10  $\mu$ m. Micrographs are representative of 3 independent experiments; at least 20 cells were assessed per replicate.

| Name & GeneID<br>(human, mouse, rat, chimpanzee)                       | mCitrine-RhoGAP                                                                     | PM-RFP                                                                              | RhoGAP + PM-RFP + IgG-E                                                             | Subcellular localisation at rest                                                           | Distribution during phagocytosis                                                                            | Phagocytic cup recruitment (score) |
|------------------------------------------------------------------------|-------------------------------------------------------------------------------------|-------------------------------------------------------------------------------------|-------------------------------------------------------------------------------------|--------------------------------------------------------------------------------------------|-------------------------------------------------------------------------------------------------------------|------------------------------------|
| Inositol polyphosphate-5-phosphatase, 75kDa (INPP5B) 3633              | 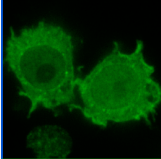   |    |    | Ubiquitous distribution; subtle accumulation at nuclear and plasma membranes               | Present at cup but already found at plasma membrane prior to particle engagement                            | None-to -subtle: 1                 |
| Oculocerebrorenal syndrome of Lowe (OCRL) 4952                         |    |    |    | Punctated and primarily found in perinuclear compartments. Also present at plasma membrane | Present at cup but already found at plasma membrane prior to particle engagement                            | None-to -subtle: 1                 |
| Rho GTPase activating protein 36 (ARHGAP36) 158763                     |    |    |    | Primarily nuclear. Also cytosolic and plasma membrane bound                                | Present at cup but already found at plasma membrane prior to particle engagement                            | None-to -subtle: 1                 |
| Rho GTPase activating protein 36 (ARHGAP36) short 158763               |   |   |   | Exclusively plasma membrane                                                                | Present at cup but already found at plasma membrane prior particle engagement. Increase in GAP fluorescence | Subtle: 2                          |
| Rho GTPase activating protein 40 (ARHGAP40) 343578                     |  |  |  | Ubiquitous distribution                                                                    | Present at cup but already found at plasma membrane prior to particle engagement                            | None-to -subtle: 1                 |
| Rho GTPase activating protein 19 (ARHGAP19) 84986                      |  |  |  | Exclusively nuclear and and somewhat plasma membrane                                       | Subcellular localisation is a compartment distant from nascent cups                                         | None: 0                            |
| Deleted in liver cancer 1 (DLC1) 10395                                 |  |  |  | Mainly cytosolic but also found at plasma membrane                                         | Present at cup but already found at plasma membrane prior particle engagement.                              | None-to -subtle: 1                 |
| StAR-related lipid transfer (START) domain containing 8 (STARDB8) 9754 |  |  |  | Ubiquitous distribution                                                                    | Present at cup but already found at plasma membrane prior to particle engagement                            | None-to -subtle: 1                 |

|                                                                                      |  |  |  |                                                                          |                                                                                         |                                      |
|--------------------------------------------------------------------------------------|--|--|--|--------------------------------------------------------------------------|-----------------------------------------------------------------------------------------|--------------------------------------|
| <p>StAR-related lipid transfer (START) domain containing 13 (STARDB13)<br/>90627</p> |  |  |  | <p>Cytosolic and plasma membrane</p>                                     | <p>Present at cup but already found at plasma membrane prior to particle engagement</p> | <p>Subtle-to-moderate:<br/>3</p>     |
| <p>Rho GTPase activating protein 21 (ARHGAP21)<br/>57584</p>                         |  |  |  | <p>Ubiquitous distribution but primarily plasma membrane and nucleus</p> | <p>Marked retention at sealed phagosome and mild accumulation at plasma membrane</p>    | <p>Subtle-to-moderate:<br/>3</p>     |
| <p>Myosin IXB (MYO9B)<br/>4650</p>                                                   |  |  |  | <p>Phagocytic cups and sealed phagosomes nearly exclusively</p>          | <p>Pronounced accumulation at phagocytic cups and internalized phagosomes</p>           | <p>Moderate-to-exceptional<br/>5</p> |
| <p>GEM interacting protein (GMIP)<br/>51291</p>                                      |  |  |  | <p>Cytosolic and plasma membrane</p>                                     | <p>Present at cup but already found at plasma membrane prior to particle engagement</p> | <p>Subtle:<br/>2</p>                 |
| <p>Rho GTPase activating protein 29 (ARHGAP29)<br/>9411</p>                          |  |  |  | <p>Cytosolic and plasma membrane</p>                                     | <p>Present at cup but already found at plasma membrane prior to particle engagement</p> | <p>Subtle:<br/>2</p>                 |
| <p>Rac GTPase activating protein 1 (RACGAP1)<br/>29127</p>                           |  |  |  | <p>Cytosolic and nuclear</p>                                             | <p>Present at cup but already found at plasma membrane prior to particle engagement</p> | <p>None-to-subtle<br/>1</p>          |
| <p>Histocompatibility (minor) HA-1 (HMHA1)<br/>23526</p>                             |  |  |  | <p>Cytosolic and plasma membrane</p>                                     | <p>Present at cup but already found at plasma membrane prior to particle engagement</p> | <p>Subtle:<br/>2</p>                 |
| <p>Synapse defective 1, Rho GTPase, homolog 2 (C. elegans) (SYDE2)<br/>84144</p>     |  |  |  | <p>Primarily nuclear. Also cytosolic and plasma membrane bound</p>       | <p>Present at cup but already found at plasma membrane prior to particle engagement</p> | <p>Subtle:<br/>2</p>                 |
| <p>RalA binding protein 1 (RALBP1)<br/>10928</p>                                     |  |  |  | <p>Ubiquitous distribution</p>                                           | <p>Present at cup but already found at plasma membrane prior to particle engagement</p> | <p>None-to-subtle<br/>1</p>          |

|                                                                          |                                                                                     |                                                                                     |                                                                                     |                                                                 |                                                                                                       |                       |
|--------------------------------------------------------------------------|-------------------------------------------------------------------------------------|-------------------------------------------------------------------------------------|-------------------------------------------------------------------------------------|-----------------------------------------------------------------|-------------------------------------------------------------------------------------------------------|-----------------------|
| Family with sequence similarity 13, member A (FAM13A) 10144              | 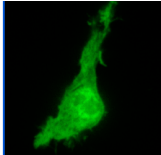   |    |    | Primarily nuclear but ubiquitously present                      | Present at cup but already found at plasma membrane prior to particle engagement                      | Subtle: 2             |
| Family with sequence similarity 13, member B (FAM13B) 51306              |    |    |    | Cytosolic and plasma membrane                                   | Cytosolic and plasma membrane                                                                         | Subtle: 2             |
| Chimerin 2 (CHN2) 1124                                                   |    |    |    | Ubiquitous distribution + punctae                               | Present at cup but already found at plasma membrane prior to particle engagement                      | Subtle: 2             |
| Chimerin 1 (CHN1) 1123                                                   |    |    |    | Primarily nuclear. Also cytosolic and plasma membrane bound     | Present at cup but already found at plasma membrane prior to particle engagement                      | Subtle-to-moderate: 3 |
| ArfGAP with RhoGAP domain, ankyrin repeat and PH domain 1 (ARAP1) 116985 |    |    |    | Ubiquitous distribution + punctae                               | Present at cup but also ubiquitously distributed                                                      | None-to-subtle 1      |
| ArfGAP with RhoGAP domain, ankyrin repeat and PH domain 3 (ARAP3) 116984 |   |   |   | Plasma membrane and cytosolic                                   | Subtle increase at phagocytic cup but already found at plasma membrane prior to particle engagement   | Subtle: 2             |
| Rho GTPase-activating protein 20 (ARHGAP20) 57569                        |  |  |  | Plasma membrane and cytosolic                                   | Moderate increase at phagocytic cup but already found at plasma membrane prior to particle engagement | Subtle-to-moderate: 3 |
| Rho GTPase activating protein 23 (ARHGAP23) 57636                        |  |  |  | Primarily plasma membrane but also cytosolic to a lesser extent | Present at cup but already found at plasma membrane prior to particle engagement                      | Subtle-to-moderate: 3 |
| Rho GTPase activating protein 15 (ARHGAP15) 55843                        |  |  |  | Plasma membrane and cytosol                                     | Present at cup but already found at plasma membrane prior to particle engagement                      | Subtle-to-moderate: 3 |

|                                                          |  |  |  |                                    |                                                                                                        |                          |
|----------------------------------------------------------|--|--|--|------------------------------------|--------------------------------------------------------------------------------------------------------|--------------------------|
| Rho GTPase activating protein 24<br>(ARHGAP24)<br>83478  |  |  |  | Primarily plasma membrane          | Marked accumulation at base of phagocytic cup although already at plasma membrane                      | Moderate<br>4            |
| Oligophrenin 1 (OPHN1)<br>4983                           |  |  |  | Primarily plasma membrane          | Recruitment to phagocytic cup exclusively                                                              | Exceptional<br>6         |
| Rho GTPase activating protein 25<br>(ARHGAP25)<br>9938   |  |  |  | Plasma membrane and cytosol        | Moderate accumulation at nascent cups. Increase is less obvious at the base of the cup than at the top | Moderate<br>4            |
| Rho GTPase activating protein 22<br>(ARHGAP22)<br>58504  |  |  |  | Exclusively at the plasma membrane | No accumulation; already present at the plasma membrane                                                | None-to -subtle<br>1     |
| *GEF/GAP* breakpoint cluster region (BCR)<br>613         |  |  |  | Plasma membrane and cytosol        | Robust recruitment to base of the cup                                                                  | Moderate<br>4            |
| *GEF/GAP* active BCR-related gene (ABR)<br>29            |  |  |  | Exclusively nuclear                | Subcellular localisation is a compartment distant from nascent cups                                    | None:<br>0               |
| Rho GTPase activating protein 27<br>(ARHGAP27)<br>201176 |  |  |  | Plasma membrane and cytosol        | Present at cup but already found at plasma membrane prior to particle engagement                       | Subtle-to-moderate:<br>3 |
| Rho GTPase activating protein 12<br>(ARHGAP12)<br>94134  |  |  |  | Plasma membrane and cytosolic      | Present at cup but already found at plasma membrane prior to particle engagement                       | Moderate<br>4            |
| Rho GTPase activating protein 8<br>(ARHGAP8)<br>23779    |  |  |  | Cytosolic                          | No obvious recruitment; ubiquitously present throughout the cell                                       | Subtle:<br>2             |

|                                                                     |  |  |  |                                                                        |                                                                                                           |                           |
|---------------------------------------------------------------------|--|--|--|------------------------------------------------------------------------|-----------------------------------------------------------------------------------------------------------|---------------------------|
| Rho GTPase activating protein 1 (ARHGAP1) 392                       |  |  |  | Ubiquitous localisation and formation of punctae.                      | No obvious recruitment; ubiquitously present throughout the cell                                          | Subtle: 2                 |
| Rho GTPase activating protein 44 (ARHGAP44) 9912                    |  |  |  | Cytosolic and plasma membrane                                          | Slight increase at the base of the phagocytic cup, although constitutively present at the plasma membrane | Subtle: 2                 |
| Rho GTPase activating protein 17 (ARHGAP17) 55114                   |  |  |  | Primarily nuclear. Also cytosolic and plasma membrane bound            | No obvious recruitment; ubiquitously present throughout the cell                                          | Subtle: 2                 |
| SH3-domain binding protein 1 (SH3BP1) 23616                         |  |  |  | Diffuse signal throughout cytosol                                      | Marked recruitment to nascent phagocytic cups                                                             | Moderate-to-exceptional 5 |
| SLIT-ROBO Rho GTPase activating protein 1 (SRGAP1) 57522            |  |  |  | Plasma membrane                                                        | Possible recruitment to nascent cups                                                                      | Subtle: 2                 |
| Rho GTPase activating protein 4, isoform 2 (ARHGAP4) 393            |  |  |  | Primarily nuclear but also cytosolic and plasma membrane bound         | No recruitment to phagocytic cups; ubiquitously present throughout the cell                               | Subtle: 2                 |
| SLIT-ROBO Rho GTPase activating protein 3, isoform a (SRGAP3) 9901  |  |  |  | Primarily nuclear but also cytosolic and plasma membrane bound         | No recruitment to phagocytic cups; ubiquitously present throughout the cell                               | Subtle: 2                 |
| SLIT-ROBO Rho GTPase activating protein 2, isoform c (SRGAP2) 23380 |  |  |  | Ubiquitous distribution                                                | No recruitment; already present at plasma membrane                                                        | None-to -subtle 1         |
| Rho GTPase activating protein 26 (ARHGAP26) 23092                   |  |  |  | Primarily plasma membrane and nuclear but to a lesser extent cytosolic | No recruitment; already present at plasma membrane                                                        | Subtle: 2                 |

|                                                                       |                                                                                     |                                                                                     |                                                                                     |                                                                              |                                                                                                            |                       |
|-----------------------------------------------------------------------|-------------------------------------------------------------------------------------|-------------------------------------------------------------------------------------|-------------------------------------------------------------------------------------|------------------------------------------------------------------------------|------------------------------------------------------------------------------------------------------------|-----------------------|
| Rho GTPase activating protein 9 (ARHGAP9) 64333                       | 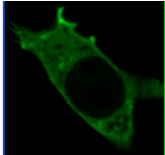   |    |    | Primarily plasma membrane and nuclear but to a lesser extent cytosolic       | Recruitment is more obvious in some cells, although already present at the PM prior to particle engagement | Moderate 4            |
| Phosphoinositide-3-kinase, regulatory subunit 1 (alpha) (PIK3R1) 5295 |    |    |    | Diffuse signal throughout cytosol                                            | Signal exclusively at the base of phagocytic cup                                                           | Exceptional 6         |
| Phosphoinositide-3-kinase, regulatory subunit 2 (beta) (PIK3R2) 5296  |    |    |    | Ubiquitous distribution; subtle accumulation at nuclear and plasma membranes | Subtle accumulation at the base of the cup                                                                 | Subtle: 2             |
| DEP domain containing 1 (DEPDC1) 55635                                |    |    |    | Low expression levels; ubiquitously distributed                              | No recruitment; already present at plasma membrane                                                         | None-to -subtle 1     |
| DEP domain containing 1B (DEPDC1B) 55789                              |    |    |    | Low expression levels; ubiquitously distributed                              | Marked retention at sealed phagosome and mild accumulation at plasma membrane                              | Subtle: 2             |
| Rho GTPase activating protein 39 (ARHGAP39) 80728                     |   |   |   | Primarily nuclear. but also cytosolic                                        | Moderate recruitment to the cup proportionally to plasma membrane increase                                 | Subtle-to-moderate: 3 |
| Rho GTPase activating protein 35 (ARHGAP35; GRLF1) 2909               |  |  |  | Diffuse signal throughout cytosol                                            | Signal exclusively at the base of phagocytic cup                                                           | Exceptional 6         |
| Rho GTPase activating protein 5 (ARHGAP5) 394                         |  |  |  | Diffuse signal throughout cytosol                                            | Slight recruitment to the cup proportionally to plasma membrane increase                                   | None-to -subtle 1     |
| T-cell activation RhoGTPase activating protein (TAGAP) 117289         |  |  |  | Ubiquitous distribution                                                      | Slight recruitment to the cup proportionally to plasma membrane increase                                   | Subtle: 2             |

|                                                                                     |                                                                                     |                                                                                     |                                                                                     |                                                       |                                                                                                                 |                          |
|-------------------------------------------------------------------------------------|-------------------------------------------------------------------------------------|-------------------------------------------------------------------------------------|-------------------------------------------------------------------------------------|-------------------------------------------------------|-----------------------------------------------------------------------------------------------------------------|--------------------------|
| Rho GTPase activating protein 32 (ARHGAP32)<br>9743                                 | 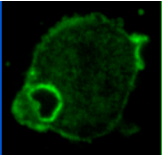   |    |    | Ubiquitous distribution but primarily plasma membrane | Present at cup but already found at plasma membrane; obvious retention at phagosomal membrane                   | Subtle-to-moderate:<br>3 |
| Rho GTPase activating protein 6 (ARHGAP6)<br>395                                    |    |    |    | Cytosolic and plasma membrane                         | No recruitment; already present at plasma membrane                                                              | Subtle:<br>2             |
| synapse defective 1, Rho GTPase, homolog 1 (C. elegans), isoform b (SYDE1)<br>85360 |    |    |    | Cytosolic and plasma membrane                         | No recruitment; already present at plasma membrane                                                              | Subtle:<br>2             |
| synapse defective 1, Rho GTPase, homolog 1 (C. elegans), isoform a (SYDE1)<br>85360 |    |    |    | Plasma membrane and cytosol                           | Present at cup but already found at plasma membrane prior particle engagement                                   | Subtle-to-moderate:<br>3 |
| Rho GTPase activating protein 30 (ARHGAP30)<br>257106                               |    |    |    | Plasma membrane and cytosol                           | Low signal intensity in the cytosol but strong recruitment to cups + retention at sealed phagosome              | Subtle-to-moderate:<br>3 |
| Rho GTPase activating protein 31 (ARHGAP31)<br>57514                                |   |   |   | Plasma membrane, nucleus and cytosol                  | Present at cup but already found at plasma membrane prior particle engagement. Mild retention at seal phagosome | Subtle-to-moderate:<br>3 |
| Rho GTPase activating protein 42 (ARHGAP42), Cdc42 GTPase-activating protein 143872 |  |  |  | Plasma membrane, nucleus and cytosol                  | Present at cup but already found at plasma membrane prior particle engagement.                                  | Subtle-to-moderate:<br>3 |
| Rho GTPase activating protein 28 (ARHGAP28)<br>79822                                |  |  |  | Ubiquitous distribution                               | Present at cup but already found at plasma membrane prior particle engagement.                                  | Subtle:<br>2             |
| Rho GTPase activating protein 18 (ARHGAP18)<br>93663                                |  |  |  | Ubiquitous distribution                               | Present at cup but already found at plasma membrane prior particle engagement.                                  | Subtle:<br>2             |



**Supplementary Figure 2: Subcellular localization of RhoGAP-family members at rest and during phagocytosis.** RhoGAP names and their corresponding gene IDs (National Centre for Biotechnology Information) are indicated in the first column. Names have been colour-coded to indicate the species from which the primary sequence was derived. The distribution of mCitrine-tagged RhoGAPs was followed by confocal microscopy in RAW 264.7 macrophages challenged with IgG-opsonized erythrocytes (IgG-E, shown in blue in column 4). In order to distinguish *bona fide* accumulation of the RhoGAP in question from bulk enrichment of plasma membrane at sites of phagocytosis, cells were transfected with the plasmalemmal marker PM-RFP. The relative extent of RhoGAP accumulation at phagocytic cups was assessed by ratiometric analysis relative to PM-RFP intensity. Itemized in this figure is also a description of the subcellular localization at rest and during phagocytosis of each RhoGAP in the collection. A score ranging from 0 to 6 (seventh column) was assigned to members of the RhoGAP family according to the robustness of their recruitment to the phagocytic cup. The background of each entry was colour-coded to facilitate interpretation: a red background corresponds to proteins that were absent from (score = 0) or barely detectable at (score = 1) the phagocytic cup, while a green background corresponds to proteins that were moderately recruited (score = 2-4). Blue background was assigned to proteins showing moderate-to-exceptional (score = 5) or exceptional (score = 6) translocation to sites of phagocytosis. Only RhoGAPs receiving scores ranging from 4-6 were selected for further screening and functional validation.

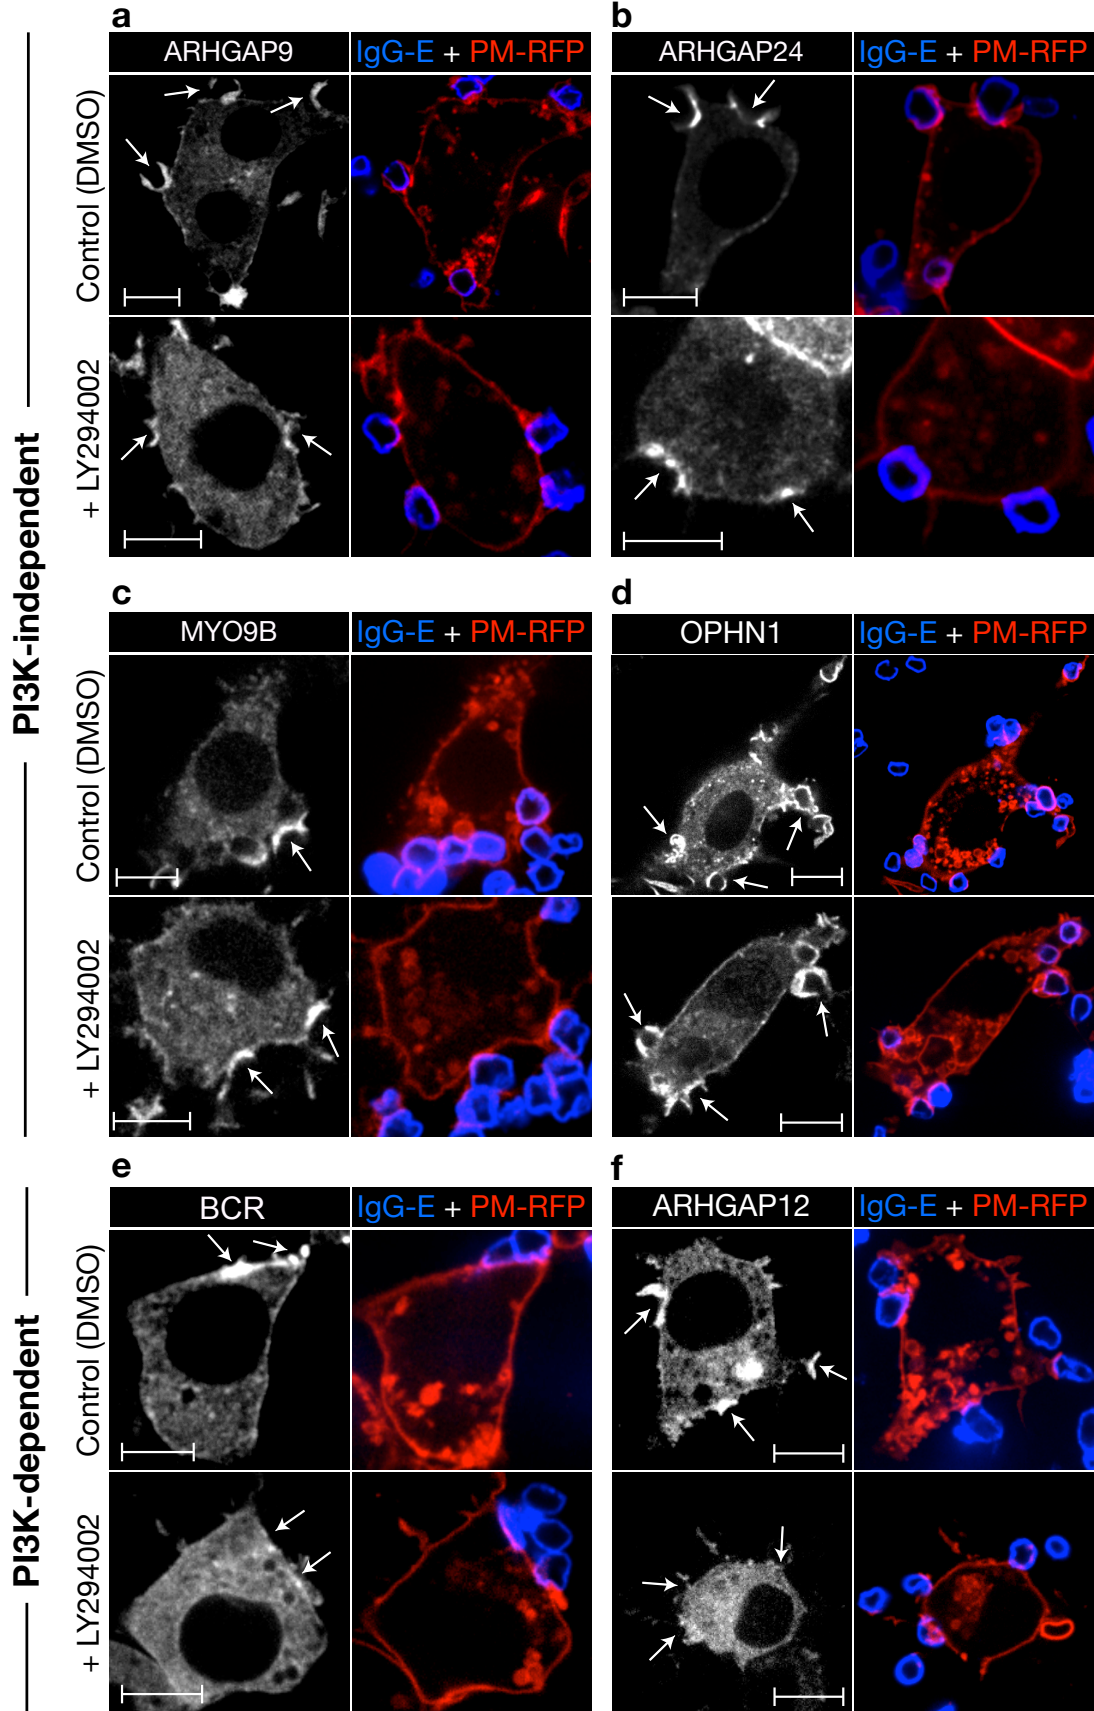

**Supplementary Figure 3: PI3K dependency of RhoGAP recruitment to phagocytic cups.** (a-f) RAW 264.7 macrophages were independently co-transfected with constructs encoding the plasmalemmal marker PM-RFP and each of the 10 RhoGAPs that most markedly accumulated at phagocytic cups. Transfectants were exposed to IgG-opsonized erythrocytes (IgG-E; shown in blue) for 3 min before being fixed and imaged by confocal microscopy. Where indicated, cells were treated with either vehicle (DMSO) or the PI3K inhibitor LY294002 for 10 min prior to the addition of phagocytic targets. RhoGAPs that were recruited to sites of phagocytosis in a PI3K-independent manner are shown in the upper four panels (a-d), while those that were sensitive to PI3K inhibition are shown in the lower two panels (e,f). Arrows point to sites of particle engagement. Scale bar, 10  $\mu$ m. Micrographs are representative of 3 independent experiments; at least 20 cells were assessed per replicate.

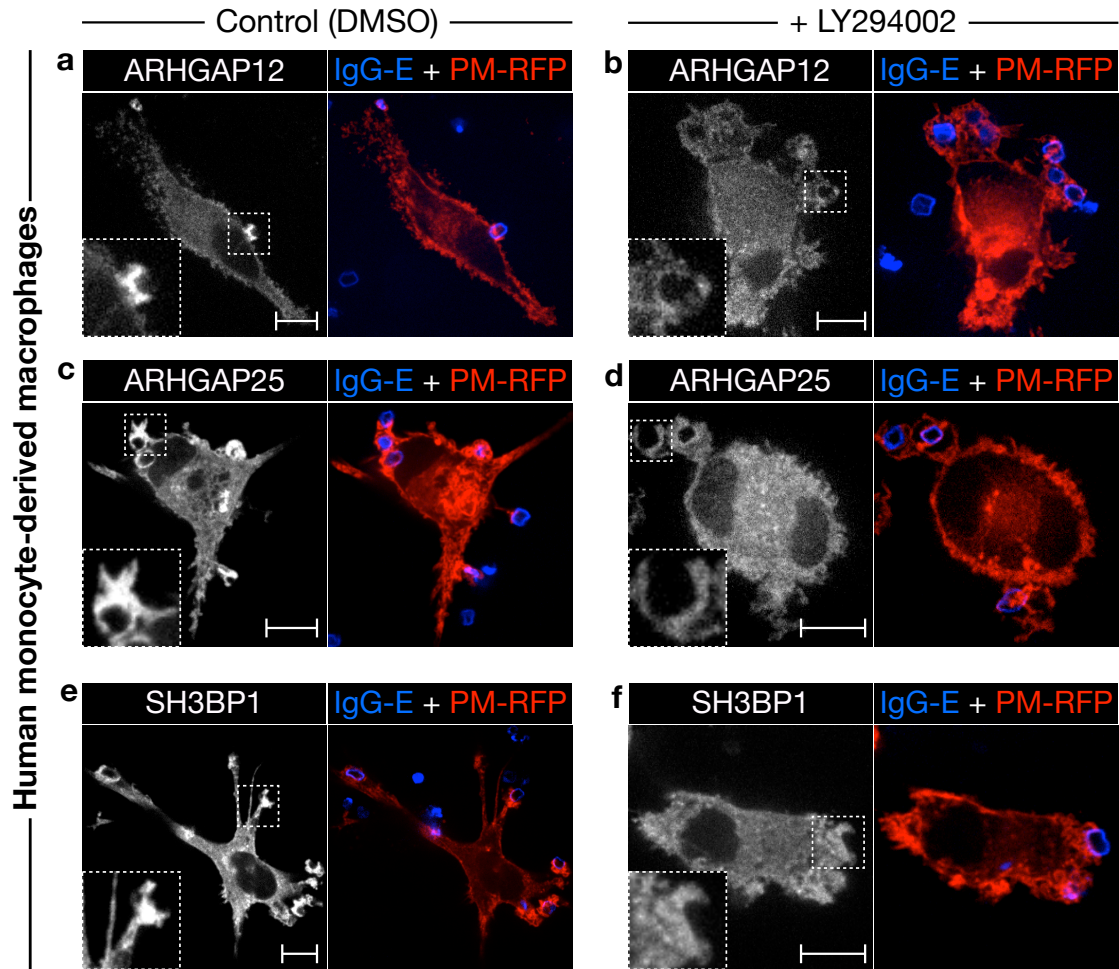

**Supplementary Figure 4: ARHGAP12, ARHGAP25 and SH3BP1 translocate to phagocytic cups in a PI3K-dependent manner in primary macrophages.** (a-f) Human monocyte-derived macrophages were co-electroporated with constructs encoding mCitrine-tagged ARHGAP12 (a,b), ARHGAP25 (c,d) or SH3BP1 (e,f) and the plasmalemmal marker PM-RFP. The electroporated cells were treated with either vehicle (DMSO; left panels) or the PI3K inhibitor LY294002 (right panels) for 10 min prior to being challenged with IgG-opsonized erythrocytes (IgG-E; shown in blue). Phagocytosis proceeded for 3 min before fixation and imaging by confocal microscopy. Insets (boxed regions) show magnified views of the phagocytic cup. Scale bar, 10  $\mu$ m. Micrographs are representative of 3 independent experiments; at least 20 cells were assessed per replicate.

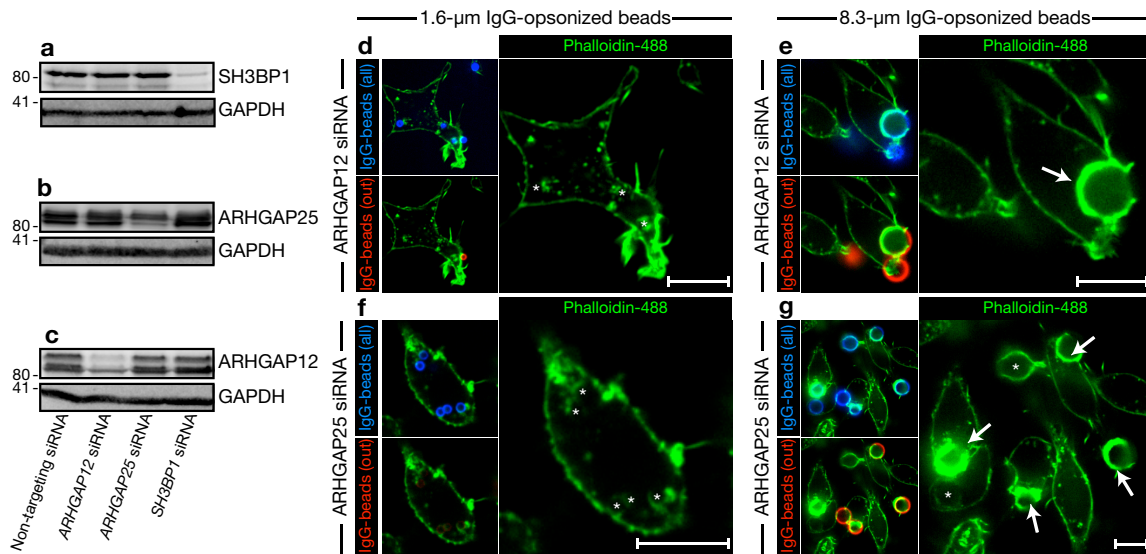

**Supplementary Figure 5: Silencing of PI3K-sensitive RhoGAPs precludes phagocytosis of large, but not small phagocytic targets.** (a-c) Representative immunoblots from 3 experiments showing protein levels of SH3BP1 (a), ARHGAP25 (b) and ARHGAP12 (c) in cells electroporated with the indicated siRNAs. (d-g) RAW 264.7 macrophages electroporated with siRNA directed against *ARHGAP12* (d,e) or *ARHGAP25* (f,g) were challenged with small (left panels) or large (right panels) IgG-opsonized phagocytic particles and fixed 10 min after particle exposure. All targets were stained with a Cy5-conjugated anti-IgG secondary antibody (shown in blue) prior to being added to phagocytes. Particles that remained extracellular (shown in red) were identified by the procedure described in the legend of Figure 4. Macrophages were then permeabilized and actin filaments stained with phalloidin-488 (shown in green). Formed phagosomes are indicated with a star. Abortive phagocytic cups, evident in cells receiving siRNA directed towards *ARHGAP12* or *ARHGAP25* and challenged with large particles, are signaled with arrows. Scale bar, 10  $\mu$ m. Micrographs are representative of 3 independent experiments; at least 20 cells were assessed per replicate.

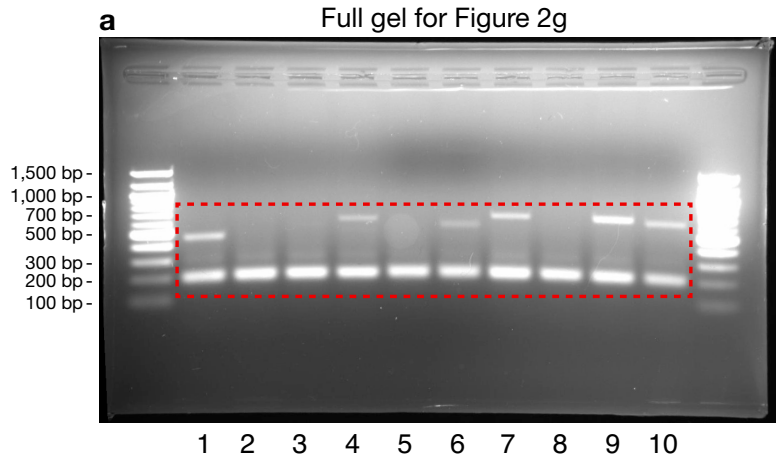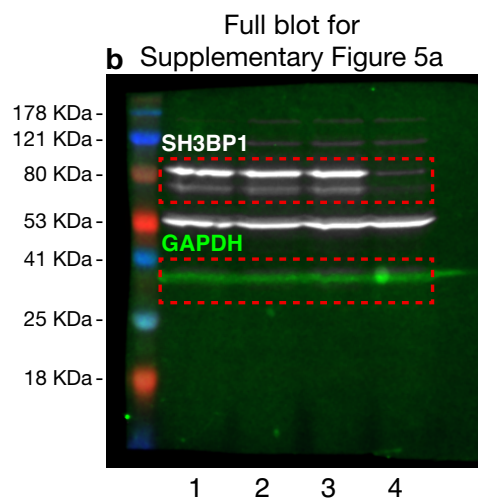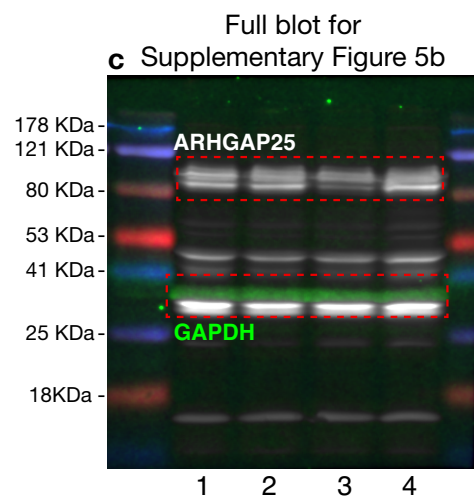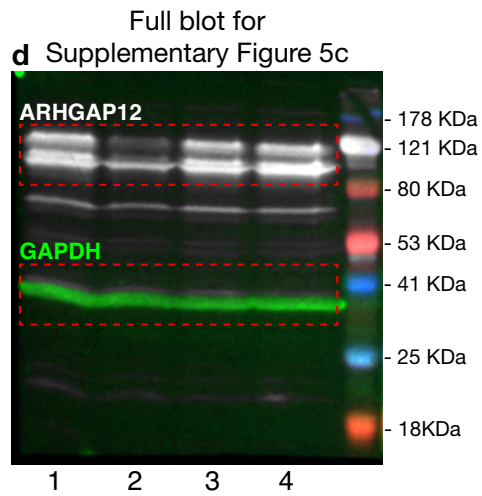

**Supplementary Figure 6: Images of uncropped gels and blots.** Images are shown in their original full-size form, as they appeared before being cropped for presentation purposes. Dashed red boxes demarcate the portions of the blots that are displayed in the final figures. **(a)** Full gel for figure 2g, indicating endogenous levels of expression of different RhoGAPs, as assessed by RT-PCR. The lower bands at 200 bp correspond to the positive control *GAPDH*; all other bands correspond to RhoGAP messages. The lanes in this gel are indicative of expression of the following transcripts: 1) *MYO9B*; 2) *ARHGAP24*; 3) *OPHN1*; 4) *ARHGAP25*; 5) *BCR*; 6) *ARHGAP12*; 7) *SH3BP1*; 8) *ARHGAP9*; 9) *PIK3R1* and; 10) *GRLF1*. **(b-d)** Full blots for Supplementary Fig. 5a-c. Each blot shows the relative protein levels of SH3BP1 **(b)**, ARHGAP25 **(c)** or ARHGAP12 **(d)** following electroporation with a non-targeting siRNA (lane 1), or with siRNA directed against *ARHGAP12* (lane 2), *ARHGAP25* (lane 3) or *SH3BP1* (lane 4). GAPDH, detected with a fluorescently conjugated secondary antibody and shown in green, was used as a loading control in all three blots.

| Name                      | Sequence (5'→3')             | Location on target | Length (bp) | Melting Temp. (°C) | Amplicon length (bp) |
|---------------------------|------------------------------|--------------------|-------------|--------------------|----------------------|
| <i>Myo9B</i> (forward)    | agtgtatcgtcatctctggtgagagtgg | Exon 2             | 28          | 59.9               | 473                  |
| <i>Myo9B</i> (reverse)    | catctccatggcctgtgaagc        | Exon 6             | 22          | 60.5               |                      |
| <i>Arhgap24</i> (forward) | tggaagactgggtgaagtccatcc     | Exon 4             | 24          | 60                 | 523                  |
| <i>Arhgap24</i> (reverse) | ttctgtgcgctcatctgttaactcc    | Exon 8             | 26          | 59.7               |                      |
| <i>Ophn1</i> (forward)    | ggagttcagcgactgctacctcg      | Exon 1             | 23          | 59.1               | 567                  |
| <i>Ophn1</i> (reverse)    | ttgaacttcttgactcctggacttcc   | Exon 7             | 27          | 59.2               |                      |
| <i>Arhgap25</i> (forward) | aaggtgggctggctgaagaagc       | Exon 2             | 22          | 60.5               | 627                  |
| <i>Arhgap25</i> (reverse) | caggaacccttcatactgactccaagg  | Exon 6             | 27          | 61.1               |                      |
| <i>Bcr</i> (forward)      | gctgaggaacagcgccgg           | Exon 2             | 18          | 58.9               | 744                  |
| <i>Bcr</i> (reverse)      | cgtgatctcctcgttgatgctgg      | Exon 8             | 23          | 60.4               |                      |
| <i>Arhgap12</i> (forward) | gactcacattctcctaaagttccagcc  | Exon 3             | 28          | 59.8               | 562                  |
| <i>Arhgap12</i> (reverse) | gttcatccagctcttctgaccaacc    | Exon 5             | 25          | 59.1               |                      |
| <i>Sh3bp1</i> (forward)   | atcctagccgagttgagatgacc      | Exon 5             | 25          | 59.7               | 659                  |
| <i>Sh3bp1</i> (reverse)   | tctgaggccatggtctgcttaagg     | Exon 11            | 24          | 60.4               |                      |
| <i>Arhgap9</i> (forward)  | catggcttgcctctctgaacagc      | Exon 3             | 24          | 59.2               | 612                  |
| <i>Arhgap9</i> (reverse)  | tccaattcgtcatcctcaccagc      | Exon 8             | 23          | 59.8               |                      |
| <i>Pik3r1</i> (forward)   | aactccgagacactgctgatggg      | Exon 10            | 23          | 59.1               | 653                  |
| <i>Pik3r1</i> (reverse)   | catgctgttgcgatctctcgg        | Exon 14            | 22          | 59.2               |                      |
| <i>Arhgap35</i> (forward) | tctgacagtgagatggacacaagttcc  | Exon 2             | 27          | 59.5               | 619                  |
| <i>Arhgap35</i> (reverse) | caatctgcatgctgtatggtaccagg   | Exon 5             | 26          | 60.5               |                      |
| <i>Gapdh</i> (forward)    | aacgggaagcccatcaccatc        | Exon 3             | 21          | 62.8               | 203                  |
| <i>Gapdh</i> (reverse)    | tggttcacacccatcacaacatgg     | Exon 4             | 25          | 63.9               |                      |

**Supplementary Table 1: Primers employed to detect endogenous RhoGAP expression in RAW 264.7 cells.**
